# Supplementary material
Source: publisher figshare collection journal article supplement (https://gsajournals.figshare.com/ndownloader/files/24436334)
Supplement: Supplementary file 1 [file 24436334]

## Sheet: Table S2
Table S2
Deficiency or RNAi	Genotype	Source	Stock # or allele type	Crossed with:	Deficiency Normal/Mild	Deficiency Moderate	Deficiency Severe	Deficiency Total	Control Normal/mild	Control Moderate	Control Severe	Control Total
Df(3L)ED4674*	w[1118]; Df(3L)ED4674, P{w[+mW.Scer\FRT.hs3]=3'.RS5+3.3'}ED4674/TM6C, cu[1] Sb[1]	Bloomington Stock Center	8098	CY2-GAL4 -> UAS-Idgf3	5	115	99	219	65	37	0	102
Df(3L)ED4674*	w[1118]; Df(3L)ED4674, P{w[+mW.Scer\FRT.hs3]=3'.RS5+3.3'}ED4674/TM6C, cu[1] Sb[1]	Bloomington Stock Center	8098	w1118	238	24	0	262	95	4	0	99
Df(3L)ED223	w[1118]; Df(3L)ED223, P{w[+mW.Scer\FRT.hs3]=3'.RS5+3.3'}ED223/TM6C, cu[1] Sb[1]	Bloomington Stock Center	8079	CY2-GAL4 -> UAS-Idgf3	31	172	49	252	175	15	0	190
Df(3L)Exel6130	w[1118]; Df(3L)Exel6130, P{w[+mC]=XP-U}Exel6130/TM6B, Tb[1]	Bloomington Stock Center	7609	CY2GAL4-gal80ts	153	28	1	182	219	12	6	237
Df(3L)Exel6130	w[1118]; Df(3L)Exel6130, P{w[+mC]=XP-U}Exel6130/TM6B, Tb[1]	Bloomington Stock Center	7609	CY2-GAL4 -> UAS-Idgf3	41	41	88	170	175	15	0	190
Df(3L)ED4685	w[1118]; Df(3L)ED4685, P{w[+mW.Scer\FRT.hs3]=3'.RS5+3.3'}ED4685/TM6C, cu[1] Sb[1]	Bloomington Stock Center	64121	w1118	91	3	1	95	lost	lost	lost	N/A
Df(3L)Exel9002	w[1118]; Df(3L)Exel9002/TM6B, Tb[1]	Bloomington Stock Center	7935	CY2-GAL4 -> UAS-Idgf3	80	40	2	122	104	73	4	181
Df(3L)Exel9004	w[1118]; Df(3L)Exel9004/TM6B, Tb[1]	Bloomington Stock Center	7937	CY2-GAL4 -> UAS-Idgf3	59	17	0	76	175	15	0	190
UAS-RNAi-CG9705	y[1] v[1]; P{y[+t7.7] v[+t1.8]=TRiP.JF02190}attP2	Bloomington Stock Center	31901	CY2-GAL4 -> UAS-Idgf3	78	39	3	120	59	63	3	125
UAS-RNAi-CG9706	y[1] v[1]; P{y[+t7.7] v[+t1.8]=TRiP.HMC03483}attP40	Bloomington Stock Center	51908	CY2-GAL4 -> UAS-Idgf3	101	62	3	166	59	63	3	125
UAS-RNAi-CG9706	P{KK108219} VIE-260B	Vienna Stock Center	V100567	CY2-GAL4 -> UAS-Idgf3	83	65	1	149	79	34	1	114
UAS-RNAi-eIF3e	P{KK101123} VIE-260B	Vienna Stock Center	V103559	CY2GAL4-> IDGF3-gal80ts 25C	169	132	3	304	73	39	1	113
UAS-RNAi-eIF3e	P{KK101123} VIE-260B	Vienna Stock Center	V103559	CY2GAL4-gal80ts 25C	90	45	2	137	219	12	6	237
UAS-RNAi-CG9674	y[1] sc[*] v[1] sev[21]; P{y[+t7.7] v[+t1.8]=TRiP.HMC04796}attP40	Bloomington Stock Center	57483	CY2-GAL4 -> UAS-Idgf3	119	17	1	137	46	24	1	71
UAS-RNAi-CG9674	y[1] sc[*] v[1] sev[21]; P{y[+t7.7] v[+t1.8]=TRiP.HMC04796}attP40	Bloomington Stock Center	57483	CY2GAL4	96	6	2	104	Lost	Lost	Lost	N/A
UAS-RNAi-nudC	y[1] sc[*] v[1] sev[21]; P{y[+t7.7] v[+t1.8]=TRiP.HMS00258}attP2/TM3, Sb[1]	Bloomington Stock Center	33382	CY2-GAL4 -> UAS-Idgf3	106	32	1	139	59	63	3	125
UAS-RNAi-nudC	y[1] v[1]; P{y[+t7.7] v[+t1.8]=TRiP.HMJ21667}attP40/CyO	Bloomington Stock Center	52980	CY2-GAL4 -> UAS-Idgf3	31	4	0	35	Lost	Lost	Lost	N/A
Df(3L)BSC289*	w[1118]; Df(3L)BSC289/TM6C, Sb[1] cu[1]	Bloomington Stock Center	23674	CY2-GAL4 -> UAS-Idgf3	47	109	18	174	159	22	1	182
Df(3L)BSC426	w[1118]; Df(3L)BSC426/TM6C, Sb[1] cu[1]	Bloomington Stock Center	24930	CY2-GAL4 -> UAS-Idgf3	32	83	2	117	68	31	3	102
Df(3L)ED4256	w[1118]; Df(3L)ED4256, P{w[+mW.Scer\FRT.hs3]=3'.RS5+3.3'}ED4256/TM6C, cu[1] Sb[1]	Bloomington Stock Center	8054	CY2-GAL4 -> UAS-Idgf3	62	38	2	102	68	31	3	102
Df(3L)Exel6087	w[1118]; Df(3L)Exel6087, P{w[+mC]=XP-U}Exel6087/TM6B, Tb[1]	Bloomington Stock Center	7566	CY2-GAL4 -> UAS-Idgf3	74	38	2	114	68	31	3	102
Df(3L)ED230*	w[1118]; Df(3L)ED230, P{w[+mW.Scer\FRT.hs3]=3'.RS5+3.3'}ED230/TM6C, cu[1] Sb[1]	Bloomington Stock Center	8089	CY2-GAL4 -> UAS-Idgf3	182	19	0	201	65	37	0	102
Df(3L)TO2	w[*]; Df(3L)TO2/TM6C, Sb[1]	Bloomington Stock Center	51608	CY2-GAL4 -> UAS-Idgf3	100	15	0	115	68	31	3	102
Df(3L)BSC554	w[1118]; Df(3L)BSC554/TM6C, Sb[1]	Bloomington Stock Center	25669	CY2-GAL4 -> UAS-Idgf3	67	18	2	87	68	31	3	102
Df(3L)BSC23*	Df(3L)BSC23, rho[ve-1] e[1]/TM2, p[p]	Bloomington Stock Center	6755	CY2-GAL4 -> UAS-Idgf3	133	5	0	138	55	60	8	123
Df(3L)BSC23*	Df(3L)BSC23, rho[ve-1] e[1]/TM2, p[p]	Bloomington Stock Center	6755	w1118	116	62	8	186	lost	lost	lost	N/A
Df(3L)BSC671*	w[1118]; Df(3L)BSC671, P+PBac{w[+mC]=XP3.WH3}BSC671/TM6C, Sb[1] cu[1]	Bloomington Stock Center	26523	w1118	104	39	1	144	45	150	27	222
Df(3L)Exel6092*	w[1118]; Df(3L)Exel6092, P{w[+mC]=XP-U}Exel6092/TM6B, Tb[1]	Bloomington Stock Center	7571	w1118	80	22	0	102	45	150	27	222
Df(3L)BSC119*	w[1118]; Df(3L)BSC119/TM6B, Tb[1]	Bloomington Stock Center	8976	w1118	32	19	0	51	45	150	27	222
Df(3L)ED4502*+	w[1118]; Df(3L)ED4502, P{w[+mW.Scer\FRT.hs3]=3'.RS5+3.3'}ED4502/TM6C, cu[1] Sb[1]	Bloomington Stock Center	8097	CY2-GAL4 -> UAS-Idgf3	41	82	2	125	65	37	0	102
Df(3L)ED4502*+	w[1118]; Df(3L)ED4502, P{w[+mW.Scer\FRT.hs3]=3'.RS5+3.3'}ED4502/TM6C, cu[1] Sb[1]	Bloomington Stock Center	8097	CY2GAL4	97	91	16	204	140	10	0	150
Df(3L)ED4502*+	w[1118]; Df(3L)ED4502, P{w[+mW.Scer\FRT.hs3]=3'.RS5+3.3'}ED4502/TM6C, cu[1] Sb[1]	Bloomington Stock Center	8097	CY2GAL4	64	129	29	222	140	15	3	158
Df(3L)ED4502*+	w[1118]; Df(3L)ED4502, P{w[+mW.Scer\FRT.hs3]=3'.RS5+3.3'}ED4502/TM6C, cu[1] Sb[1]	Bloomington Stock Center	8097	CY2GAL4	65	153	41	259	138	24	1	163
Df(3L)ED4502*+	w[1118]; Df(3L)ED4502, P{w[+mW.Scer\FRT.hs3]=3'.RS5+3.3'}ED4502/TM6C, cu[1] Sb[1]	Bloomington Stock Center	8097	CY2-GAL4 -> UAS-Idgf3	65	167	15	247	147	64	2	213
Df(3L)ED4502*+	w[1118]; Df(3L)ED4502, P{w[+mW.Scer\FRT.hs3]=3'.RS5+3.3'}ED4502/TM6C, cu[1] Sb[1]	Bloomington Stock Center	8097	CY2-GAL4 -> UAS-Idgf3	3	51	5	59	60	101	6	167
Df(3L)ED4502*+	w[1118]; Df(3L)ED4502, P{w[+mW.Scer\FRT.hs3]=3'.RS5+3.3'}ED4502/TM6C, cu[1] Sb[1]	Bloomington Stock Center	8097	CY2-GAL4 -> UAS-Idgf3	15	219	45	279	112	79	13	204
Df(3L)Exel6119	w[1118]; Df(3L)Exel6119, P{w[+mC]=XP-U}Exel6119/TM6B, Tb[1]	Bloomington Stock Center	7598	CY2GAL4	54	158	76	288	82	6	0	88
Df(3L)Exel6119	w[1118]; Df(3L)Exel6119, P{w[+mC]=XP-U}Exel6119/TM6B, Tb[1]	Bloomington Stock Center	7598	CY2-GAL4 -> UAS-Idgf3	31	131	72	234	52	15	3	70
Df(3L)BSC614	w[1118]; Df(3L)BSC614/TM6C, cu[1] Sb[1]	Bloomington Stock Center	25689	CY2GAL4	94	19	0	113	82	6	0	88
Df(3L)BSC614	w[1118]; Df(3L)BSC614/TM6C, cu[1] Sb[1]	Bloomington Stock Center	25689	CY2-GAL4 -> UAS-Idgf3	68	49	4	121	52	15	3	70
UAS-RNAi-caps	y[1] v[1]; P{y[+t7.7] v[+t1.8]=TRiP.JF02854}attP2	Bloomington Stock Center	28020	CY2-GAL4 -> UAS-Idgf3	79	28	0	107	79	34	1	114
UAS-RNAi-Tgi	y[1] sc[*] v[1] sev[21]; P{y[+t7.7] v[+t1.8]=TRiP.HMS00981}attP2	Bloomington Stock Center	34394	CY2-GAL4 -> UAS-Idgf3	82	21	0	103	79	34	1	114
UAS-RNAi-cmb	P{KK103563}VIE-260B	Vienna Stock Center	V109767	CY2-GAL4 -> UAS-Idgf3	61	61	0	122	79	34	1	114
cmb knock out allele	w[1118 ]; +/+ ; cmb[KO]/TM6B, Hu	Andreas Jenny	cmbKO	CY2GAL4	162	22	0	184	140	10	0	150
cmb knock out allele	w[1118 ]; +/+ ; cmb[KO]/TM6B, Hu	Andreas Jenny	cmbKO	CY2GAL4	97	6	0	103	140	15	3	158
cmb knock out allele	w[1118 ]; +/+ ; cmb[KO]/TM6B, Hu	Andreas Jenny	cmbKO	CY2GAL4	89	4	0	93	138	24	1	163
cmb knock out allele	w[1118 ]; +/+ ; cmb[KO]/TM6B, Hu	Andreas Jenny	cmbKO	CY2-GAL4 -> UAS-Idgf3	109	80	0	189	147	64	2	213
cmb knock out allele	w[1118 ]; +/+ ; cmb[KO]/TM6B, Hu	Andreas Jenny	cmbKO	CY2-GAL4 -> UAS-Idgf3	55	133	0	188	60	101	6	167
cmb knock out allele	w[1118 ]; +/+ ; cmb[KO]/TM6B, Hu	Andreas Jenny	cmbKO	CY2-GAL4 -> UAS-Idgf3	67	99	1	167	112	79	13	204
UAS-cmb	w[1118] P{UAS-cmb.RB} ; +/+ ; +/+	Andreas Jenny	UAS-cmbRB	CY2GAL4	117	6	0	123	140	10	0	150
UAS-cmb	w[1118] P{UAS-cmb.RB} ; +/+ ; +/+	Andreas Jenny	UAS-cmbRB	CY2GAL4	102	27	1	130	140	15	3	158
UAS-cmb	w[1118] P{UAS-cmb.RB} ; +/+ ; +/+	Andreas Jenny	UAS-cmbRB	CY2GAL4	85	13	0	98	138	24	1	163
UAS-cmb	w[1118] P{UAS-cmb.RB} ; +/+ ; +/+	Andreas Jenny	UAS-cmbRB	CY2-GAL4 -> UAS-Idgf3	83	17	0	100	147	64	2	213
UAS-cmb	w[1118] P{UAS-cmb.RB} ; +/+ ; +/+	Andreas Jenny	UAS-cmbRB	CY2-GAL4 -> UAS-Idgf3	45	12	0	57	60	101	6	167
UAS-cmb	w[1118] P{UAS-cmb.RB} ; +/+ ; +/+	Andreas Jenny	UAS-cmbRB	CY2-GAL4 -> UAS-Idgf3	45	30	1	76	112	79	13	204
*Original deficiency
+three biological replicas
